# Supplementary material for: The Influence of Sleep Quality, Vigilance, and Sleepiness on Driving-Related Cognitive Abilities: A Comparison between Young and Older Adults
Source: PubMed Central journal article supplement (PMC7349304; doi:10.3390/brainsci10060327), 2020-05-28
Supplement: brainsci-10-00327-s001.pdf [file brainsci-10-00327-s001.pdf]

# Supplementary Materials: The Influence of Sleep Quality, Vigilance, and Sleepiness on Driving-Related Cognitive Abilities: A Comparison between Young and Older Adults

**Table S1. Results of multiple regression model with the control for gender.** Results of multiple regressions (the  $\alpha$ -value after FDR procedure was adjusted to a critic  $p=0.019$ ) considering driving-related cognitive abilities (COG, ATAVT, WRB-TV) as criterion variables and gender, age, TST, PSQI, KSS, ESS, Median PVT, 10% slowest RTs PVT, 10% fastest RTs PVT as predictors. After the correction for multiple comparisons by using FDR, each result remains statistically significant.

| Dependent Variables                                                                                              | Predictors          | Beta   | Coefficients of Partial Correlation | <i>t</i> | <i>p</i> -level |
|------------------------------------------------------------------------------------------------------------------|---------------------|--------|-------------------------------------|----------|-----------------|
| <b>COG mean time correct rejections</b><br>R= 0.777; adjusted<br>$R^2=0.554$ ; $F_{9,70} =11.887$ ;<br>$P<0.001$ | Gender              | -0.024 | -0.036                              | -0.304   | 0.762           |
|                                                                                                                  | Age                 | -0.758 | -0.715                              | -8.549   | $p<0.001$       |
|                                                                                                                  | PSQI                | -0.099 | -0.138                              | -1.165   | 0.248           |
|                                                                                                                  | TST                 | 0.114  | 0.173                               | 1.466    | 0.147           |
|                                                                                                                  | KSS                 | -0.026 | -0.037                              | -0.310   | 0.758           |
|                                                                                                                  | ESS                 | -0.046 | -0.068                              | -0.569   | 0.571           |
|                                                                                                                  | Median PVT          | 0.053  | 0.026                               | 0.214    | 0.831           |
|                                                                                                                  | 10% slowest RTs PVT | -0.084 | -0.069                              | -0.580   | 0.564           |
|                                                                                                                  | 10% fastest RTs PVT | 0.003  | 0.002                               | 0.018    | 0.986           |
| <b>COG total working time</b><br>R=0.778; adjusted<br>$R^2=0.554$ ; $F_{9,70} =11.889$ ;<br>$P<0.001$            | Gender              | -0.036 | -0.056                              | -0.466   | 0.643           |
|                                                                                                                  | Age                 | 0.767  | 0.719                               | 8.653    | $p<0.001$       |
|                                                                                                                  | PSQI                | 0.058  | 0.081                               | 0.679    | 0.499           |
|                                                                                                                  | TST                 | -0.106 | -0.161                              | -1.366   | 0.176           |
|                                                                                                                  | KSS                 | 0.039  | 0.055                               | 0.462    | 0.645           |
|                                                                                                                  | ESS                 | 0.026  | 0.038                               | 0.316    | 0.753           |
|                                                                                                                  | Median PVT          | 0.026  | 0.012                               | 0.103    | 0.918           |
|                                                                                                                  | 10% slowest RTs PVT | 0.079  | 0.065                               | 0.548    | 0.585           |
|                                                                                                                  | 10% fastest RTs PVT | -0.054 | -0.035                              | -0.289   | 0.773           |
| <b>ATAVT performance</b><br>R=0.633; adjusted<br>$R^2=0.293$ ; $F_{9,50} =3.722$ ;<br>$P=0.001$                  | Gender              | -0.240 | -0.286                              | -2.111   | <b>0.040</b>    |
|                                                                                                                  | Age                 | -0.552 | -0.535                              | -4.483   | $p<0.001$       |
|                                                                                                                  | PSQI                | -0.014 | -0.016                              | -0.116   | 0.908           |
|                                                                                                                  | TST                 | 0.191  | 0.224                               | 1.625    | 0.111           |
|                                                                                                                  | KSS                 | -0.089 | -0.100                              | -0.710   | 0.481           |
|                                                                                                                  | ESS                 | 0.014  | 0.017                               | 0.120    | 0.905           |
|                                                                                                                  | Median PVT          | -0.247 | -0.121                              | -0.865   | 0.391           |
|                                                                                                                  | 10% slowest RTs PVT | -0.002 | -0.002                              | -0.011   | 0.991           |
|                                                                                                                  | 10% fastest RTs PVT | -0.024 | -0.017                              | -0.117   | 0.908           |
| <b>ATAVT total working time</b>                                                                                  | Gender              | -0.029 | -0.036                              | -0.255   | 0.800           |
|                                                                                                                  | Age                 | 0.601  | 0.571                               | 4.914    | $p<0.001$       |
|                                                                                                                  | PSQI                | -0.139 | -0.165                              | -1.184   | 0.242           |
|                                                                                                                  | TST                 | 0.056  | 0.068                               | 0.483    | 0.631           |

|                                                                                                     |                     |        |        |        |              |
|-----------------------------------------------------------------------------------------------------|---------------------|--------|--------|--------|--------------|
| R=0.640; adjusted<br>R <sup>2</sup> =0.304; $F_{9,50} = 3.863$ ;<br><b>P=0.001</b>                  | KSS                 | -0.068 | -0.077 | -0.546 | 0.588        |
|                                                                                                     | ESS                 | -0.079 | -0.095 | -0.673 | 0.504        |
|                                                                                                     | Median PVT          | 0.207  | 0.103  | 0.729  | 0.469        |
|                                                                                                     | 10% slowest RTs PVT | 0.030  | 0.023  | 0.165  | 0.869        |
|                                                                                                     | 10% fastest RTs PVT | -0.357 | -0.236 | -1.716 | 0.092        |
| <b>WRB-TV</b><br>R=0.487; adjusted<br>R <sup>2</sup> =0.139; $F_{9,70} = 2.420$ ;<br><b>P=0.019</b> | Gender              | 0.018  | 0.020  | 0.168  | 0.867        |
|                                                                                                     | Age                 | 0.385  | 0.350  | 3.127  | <b>0.003</b> |
|                                                                                                     | PSQI                | 0.062  | 0.062  | 0.522  | 0.603        |
|                                                                                                     | TST                 | -0.025 | -0.028 | -0.231 | 0.818        |
|                                                                                                     | KSS                 | -0.034 | -0.034 | -0.285 | 0.776        |
|                                                                                                     | ESS                 | -0.160 | -0.169 | -1.430 | 0.157        |
|                                                                                                     | Median PVT          | 0.107  | 0.037  | 0.307  | 0.760        |
|                                                                                                     | 10% slowest RTs PVT | -0.315 | -0.185 | -1.571 | 0.121        |
| 10% fastest RTs PVT                                                                                 | 0.073               | 0.034  | 0.283  | 0.778  |              |

**Table S2. Results of multiple regression model with the control for gender, excluding the age predictor.** Results of the multiple regression considering the performance in the selective attention test (COG mean time correct rejection) as criterion variable and gender, TST, PSQI, KSS, ESS, Median PVT, 10% slowest RTs PVT, 10% fastest RTs PVT as predictors. After the correction for multiple comparisons by using FDR, the result does not remain statistically significant.

| Dependent Variables                                                                                                     | Predictors          | Beta   | Coefficients of Partial Correlation | <i>t</i> | <i>p</i> -level |
|-------------------------------------------------------------------------------------------------------------------------|---------------------|--------|-------------------------------------|----------|-----------------|
| COG mean time correct rejections<br>R= 0.438; adjusted<br>R <sup>2</sup> =0.100; $F_{8,71} = 2.103$ ;<br><b>P=0.047</b> | Gender              | -0.004 | -0.005                              | -0.040   | 0.968           |
|                                                                                                                         | PSQI                | -0.254 | -0.248                              | -2.153   | 0.035           |
|                                                                                                                         | TST                 | 0.004  | 0.004                               | 0.035    | 0.973           |
|                                                                                                                         | KSS                 | 0.231  | 0.235                               | 2.037    | 0.045           |
|                                                                                                                         | ESS                 | -0.005 | -0.006                              | -0.046   | 0.963           |
|                                                                                                                         | Median PVT          | 0.710  | 0.242                               | 2.101    | 0.039           |
|                                                                                                                         | 10% slowest RTs PVT | -0.391 | -0.228                              | -1.970   | 0.053           |
| 10% fastest RTs PVT                                                                                                     | -0.503              | -0.232 | -2.012                              | 0.048    |                 |
